# Supplementary material for: Comparison of microwave and mechanochemical energy inputs in the catalytic oxidation of cyclohexane
Source: Royal Society of Chemistry journal article supplement (doi:10.1039/c8dt00866c), 2018-01-01
Supplement: c8dt00866c1.pdf [file c8dt00866c1.pdf]

## Electronic Supplementary Information

### On the comparison of microwave and mechanochemical energy inputs in catalytic oxidation of cyclohexane

Ana P.C. Ribeiro,<sup>a</sup> Elisabete C.B.A. Alegria,<sup>a,b,\*</sup> Maximilian N. Kopylovich,<sup>a</sup> Ana M. Ferraria,<sup>c</sup> Ana M. Botelho do Rego,<sup>c</sup> Armando J.L. Pombeiro<sup>a,\*</sup>

<sup>a</sup>Centro de Química Estrutural, Instituto Superior Técnico, Universidade de Lisboa, Av. Rovisco Pais, 1049-001 Lisboa, Portugal.

<sup>b</sup>Chemical Engineering Department, Instituto Superior de Engenharia de Lisboa, Instituto Politécnico de Lisboa, R. Conselheiro Emídio Navarro, 1, 1959-007 Lisboa, Portugal.

<sup>c</sup>Centro de Química-Física Molecular, Institute of Nanoscience and Nanotechnology and IBB-Institute for Bioengineering and Biosciences, Instituto Superior Técnico, Universidade de Lisboa, 1049-001 Lisboa, Portugal

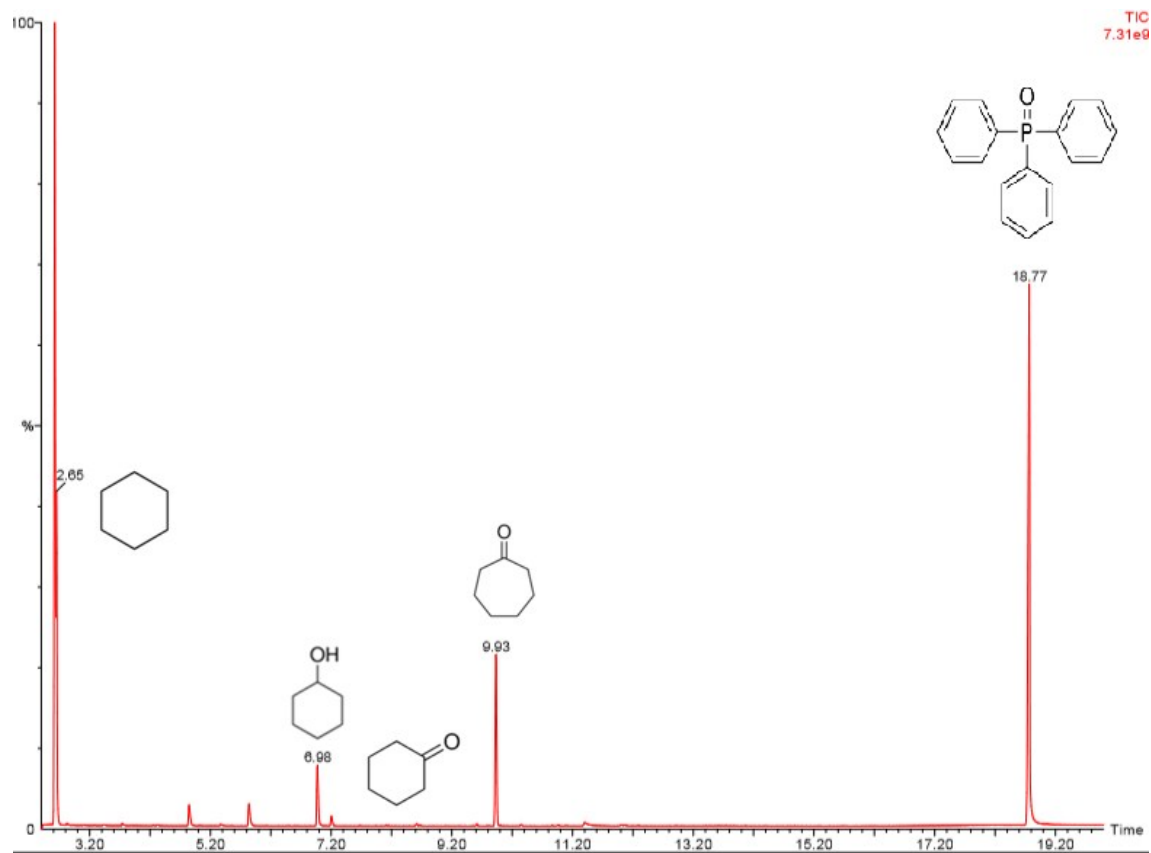

Fig. S1 - Results of the GC analysis, after the addition of  $\text{PPh}_3$ .
